# Supplementary material for: Shoreline exposure controls teal carbon accumulation in boreal lakes
Source: Copernicus journal article supplement (doi:10.5194/egusphere-2025-5053), 2025-12-12
Supplement: Supplementary file 1 [file egusphere-2025-5053-supplement.pdf]

# Shoreline exposure controls teal carbon accumulation in boreal lakes

Ana Lúcia Lindroth Dauner<sup>1</sup>, Max O. A. Kankainen<sup>1</sup>, Sakari Väkevää<sup>2</sup>, Eero Asmala<sup>3</sup>, Marko Järvinen<sup>2</sup>, Karoliina Koho<sup>3</sup>, Tom Jilbert<sup>1</sup>

<sup>1</sup>Environmental Geochemistry Group, Department of Geosciences and Geography, University of Helsinki, Gustaf  
5 Hällströmin Katu 2, Helsinki, 00560, Finland

<sup>2</sup>Finnish Environment Institute (Syke), Latokartanonkaari 11, Helsinki, 00790, Finland

<sup>3</sup>Geological Survey of Finland (GTK), Vuorimiehentie 5, P.O. Box 96, Espoo, 02151, Finland

*Correspondence to:* Ana Lúcia Lindroth Dauner ([ana.lindrothdauner@helsinki.fi](mailto:ana.lindrothdauner@helsinki.fi); [anadauner@gmail.com](mailto:anadauner@gmail.com))

15   **Tables and Equations**

Material and Methods

Study Area

Table S1. Water quality of sampled lakes (Syke, 2025).

| Lake                                      | Vesijärvi                        | Kallavesi                          | Oulujärvi   |
|-------------------------------------------|----------------------------------|------------------------------------|-------------|
| Type                                      | Large clearwater                 | Large humic                        | Large humic |
| Chlorophyll-a [ $\mu\text{g L}^{-1}$ ]    | 5.1 (N basin) –<br>7.6 (S basin) | 10.5 (S basin) –<br>12.1 (N basin) | 5.7         |
| Total Phosphorus [ $\mu\text{g L}^{-1}$ ] | 15 (N basin) –<br>33 (S basin)   | 20 (S basin) –<br>27 (N basin)     | 13          |
| Total Nitrogen [ $\mu\text{g L}^{-1}$ ]   | 351 (N basin) –<br>459 (S basin) | 629 (S basin) –<br>719 (N basin)   | 351         |
| Colour [ $\text{mg Pt L}^{-1}$ ]          | 14 (N basin) –<br>25 (S basin)   | 65 (S basin) –<br>102 (N basin)    | 86          |

## Sampling procedure

**Table S2. Coordinates (WGS84) of sampled sediment cores and description of sampled areas. Vegetation density is presented as all stems, followed by only *Phragmites australis* inside parenthesis.**

| Lake      | Site | Zone         | Latitude | Longitude | Depth of standing water [m] | Main vegetation                                           | Vegetation density [stems m <sup>-2</sup> ] | Slope [distance depth <sup>-1</sup> ] | Average fetch length [m] |
|-----------|------|--------------|----------|-----------|-----------------------------|-----------------------------------------------------------|---------------------------------------------|---------------------------------------|--------------------------|
| Oulujärvi | A    | landside     | 64.52355 | 26.81908  | 0.20                        | <i>Equisetum</i> ,<br><i>Carex</i>                        | 369 (0)                                     | 294                                   | 338                      |
|           |      | transitional | 64.52355 | 26.81866  | 0.44                        | <i>Equisetum</i>                                          | 680 (0)                                     |                                       |                          |
|           |      | waterside    | 64.52355 | 26.81804  | 0.37                        | <i>Equisetum</i> ,<br><i>Carex</i>                        | 409 (0)                                     |                                       |                          |
|           | B    | landside     | 64.35013 | 28.02235  | 0.21                        | <i>Carex</i> ,<br><i>Equisetum</i>                        | 61 (0)                                      | 197                                   | 186                      |
|           |      | transitional | 64.35030 | 28.02277  | 0.34                        | <i>Equisetum</i> ,<br><i>Carex</i>                        | 62 (0)                                      |                                       |                          |
|           |      | waterside    | 64.35048 | 28.02319  | 0.50                        | <i>Equisetum</i> ,<br><i>Carex</i>                        | 254 (0)                                     |                                       |                          |
|           | C    | landside     | 64.28800 | 27.56502  | 0.15                        | <i>Carex</i>                                              | 156 (0)                                     | 108                                   | 2834                     |
|           |      | transitional | 64.28818 | 27.56543  | 0.29                        | <i>Carex</i> ,<br><i>Equisetum</i> ,<br><i>Phragmites</i> | 220 (10)                                    |                                       |                          |
|           |      | waterside    | 64.28826 | 27.56564  | 0.55                        | <i>Phragmites</i> ,<br><i>Equisetum</i>                   | 157 (141)                                   |                                       |                          |
| Kallavesi | D    | landside     | 62.99400 | 27.51157  | 0.22                        | <i>Phragmites</i> ,<br><i>Carex</i>                       | 71 (17)                                     | 119                                   | 1161                     |
|           |      | transitional | 62.99382 | 27.51117  | 0.90                        | <i>Phragmites</i>                                         | 66 (66)                                     |                                       |                          |
|           |      | waterside    | 62.99338 | 27.51018  | 1.05                        | <i>Phragmites</i>                                         | 33 (33)                                     |                                       |                          |
|           | E    | landside     | 62.76276 | 27.68925  | 0.24                        | <i>Phragmites</i>                                         | 73 (73)                                     | 22                                    | 411                      |
|           |      | transitional | 62.76285 | 27.68944  | 0.46                        | <i>Phragmites</i>                                         | 230 (230)                                   |                                       |                          |
|           |      | waterside    | 62.76294 | 27.68964  | 1.10                        | <i>Phragmites</i>                                         | 125 (125)                                   |                                       |                          |
|           | F    | landside     | 62.78582 | 27.93125  | 0.60                        | <i>Phragmites</i> ,<br><i>Equisetum</i>                   | 113 (83)                                    | 227                                   | 784                      |
|           |      | transitional | 62.78573 | 27.93124  | 1.13                        | <i>Phragmites</i> ,<br><i>Carex</i>                       | 63 (62)                                     |                                       |                          |
|           |      | waterside    | 62.78546 | 27.93123  | 1.23                        | <i>Phragmites</i>                                         | 68 (68)                                     |                                       |                          |

**Table S2. Continuation.**

| Lake      | Site | Zone         | Latitude | Longitude | Depth of standing water [m] | Main vegetation              | Vegetation density [stems m <sup>-2</sup> ] | Slope [distance depth <sup>-1</sup> ] | Average fetch length [m] |
|-----------|------|--------------|----------|-----------|-----------------------------|------------------------------|---------------------------------------------|---------------------------------------|--------------------------|
| Vesijärvi | G    | landside     | 61.17794 | 25.50480  | 0.10                        | <i>Phragmites</i>            | 119 (119)                                   | 169                                   | 1631                     |
|           |      | transitional | 61.17758 | 25.50481  | 0.15                        | <i>Phragmites</i>            | 197 (197)                                   |                                       |                          |
|           |      | waterside    | 61.17695 | 25.50484  | 0.75                        | <i>Phragmites</i>            | 165 (165)                                   |                                       |                          |
|           | H    | landside     | 61.07740 | 25.45393  | 0.05                        | <i>Phragmites</i>            | 98 (97)                                     | 169                                   | 819                      |
|           |      | transitional | 61.07740 | 25.45319  | 0.05                        | <i>Phragmites, Equisetum</i> | 375 (330)                                   |                                       |                          |
|           |      | waterside    | 61.07738 | 25.45189  | 0.70                        | <i>Phragmites, Equisetum</i> | 79 (77)                                     |                                       |                          |
|           | I    | landside     | 61.03494 | 25.59853  | 0.55                        | <i>Phragmites</i>            | 52 (52)                                     | 173                                   | 1314                     |
|           |      | transitional | 61.03495 | 25.59871  | 0.50                        | <i>Phragmites</i>            | 58 (58)                                     |                                       |                          |
|           |      | waterside    | 61.03495 | 25.59890  | 0.70                        | <i>Phragmites</i>            | 62 (62)                                     |                                       |                          |

## Data analyses

Wet bulk density (WBD) and dry bulk density (DBD) were determined based on the sediment density corrected by organic matter content (Eq. 1 from the main text), the water content and the sample volume. Porosity  $\Phi$  as a fraction of 1 and sediment content [%] were then used to calculate WBD and DBD (Eq. 2 and Eq. 3 in the main text). The step-by-step calculation follows below:

$$\text{Water content [\%]} = \frac{\text{Wet sample weight [g]} - \text{Dry sample weight [g]}}{\text{Wet sample weight [g]}} * 100 \quad (\text{S1})$$

$$\text{Sediment content [\%]} = 100 - \text{Water content [\%]} \quad (\text{S2})$$

$$\text{Relative sediment volume} = \frac{\text{Sediment content [\%]}}{\text{Sediment density} \left[ \frac{\text{g}}{\text{cm}^3} \right]} \quad (\text{S3})$$

$$\text{Sediment volume [\%]} = 100 * \frac{\text{Relative sediment volume}}{\text{Relative sediment volume} + \text{Water content [\%]}} \quad (\text{S4})$$

40

$$\text{Porosity } \Phi [\text{fraction of 1}] = \frac{(100 - \text{Sediment volume [\%]})}{100} \quad (\text{S5})$$

Results

Table S3. Results from the post hoc Tukey Pairwise Comparison test used to compare grain size distribution across lakes and zones.

Significance codes based on *p*-value: ‘\*\*\*’: < 0.001; ‘\*\*’: < 0.01; ‘\*’: < 0.05; ‘.’: < 0.1.

|                          | Difference in means | <i>p</i> -adjusted | Significance |
|--------------------------|---------------------|--------------------|--------------|
| Across lakes             |                     |                    |              |
| Vesijärvi – Kallavesi    | -22.3               | 0.0000             | ***          |
| Oulujärvi – Kallavesi    | 3.5                 | 0.5849             |              |
| Oulujärvi – Vesijärvi    | 25.8                | 0.0000             | ***          |
| Across zones             |                     |                    |              |
| transitional – landside  | 7.0                 | 0.1526             |              |
| waterside – landside     | -10.3               | 0.0184             | *            |
| waterside - transitional | -17.3               | 0.0000             | ***          |

**Table S4. Results from the post hoc Tukey Pairwise Comparison test used to compare total organic carbon (TOC) content across lakes, zones and grain size classes.**

**Abbreviations: C sand = coarse sands; M sand = medium sands; F sand = fine sands; VF sand = very fine sands.**

**Significance codes based on  $p$ -value: '\*\*\*':  $< 0.001$ ; '\*\*':  $< 0.01$ ; '\*':  $< 0.05$ ; '.':  $< 0.1$ .**

|                                  | Difference in means | $p$ -adjusted | Significance |
|----------------------------------|---------------------|---------------|--------------|
| <b>Across lakes</b>              |                     |               |              |
| Vesijärvi - Kallavesi            | -0.4                | 0.0054        | **           |
| Oulujärvi - Kallavesi            | 0.4                 | 0.0072        | **           |
| Oulujärvi - Vesijärvi            | 0.8                 | 0.0000        | ***          |
| <b>Across zones</b>              |                     |               |              |
| transitional - landside          | 0.1                 | 0.9034        |              |
| waterside - landside             | -0.4                | 0.0119        | *            |
| waterside - transitional         | -0.4                | 0.0029        | **           |
| <b>Across grain size classes</b> |                     |               |              |
| M sand - C sand                  | -0.7                | 0.1464        |              |
| F sand - C sand                  | -0.4                | 0.5727        |              |
| VF sand - C sand                 | -0.3                | 0.8491        |              |
| silt - C sand                    | 1.0                 | 0.0040        | **           |
| F sand - M sand                  | 0.3                 | 0.4992        |              |
| VF sand - M sand                 | 0.4                 | 0.0678        | .            |
| silt - M sand                    | 1.7                 | 0.0000        | ***          |
| VF sand - F sand                 | 0.1                 | 0.8085        |              |
| silt - F sand                    | 1.4                 | 0.0000        | ***          |
| silt - VF sand                   | 1.3                 | 0.0000        | ***          |



**Table S5. Results from the post hoc Tukey Pairwise Comparison test used to compare sedimentary organic carbon (SOC) stocks across lakes, zones, vegetation types and grain size classes.**

**Abbreviations:** C+M sand = coarse and medium sands; F+VF sand = fine and very fine sands.

**Significance codes based on  $p$ -value:** ‘\*\*\*’: < 0.001; ‘\*\*’: < 0.01; ‘\*’: < 0.05; ‘.’: < 0.1.

|                                  | Difference in means | $p$ -adjusted | Significance |
|----------------------------------|---------------------|---------------|--------------|
| <b>Across lakes</b>              |                     |               |              |
| Vesijärvi - Kallavesi            | -0.2                | 0.6670        |              |
| Oulujärvi - Kallavesi            | 0.3                 | 0.4542        |              |
| Oulujärvi - Vesijärvi            | 0.5                 | 0.1146        |              |
| <b>Across zones</b>              |                     |               |              |
| transitional - landside          | 0.0                 | 0.9812        |              |
| waterside - landside             | -0.3                | 0.3462        |              |
| waterside - transitional         | -0.4                | 0.2623        |              |
| <b>Across vegetation types</b>   |                     |               |              |
| Mixed - Phragmites               | -0.1                | 0.8906        |              |
| Others - Phragmites              | 0.6                 | 0.0230        | *            |
| Others - Mixed                   | 0.7                 | 0.0272        | *            |
| <b>Across grain size classes</b> |                     |               |              |
| (F+VF) sand - (C+M) sand         | -0.1                | 0.9425        |              |
| silt - (C+M) sand                | 0.7                 | 0.0529        | .            |
| silt - (F+VF) sand               | 0.8                 | 0.0001        | ***          |

**Table S6. Significance of the four environmental numerical parameters used to explain variations in sedimentary organic carbon (SOC) stocks using a generalized linear model (GLM; pseudo-R<sup>2</sup>: 0.69; n = 27).**

**Significance codes based on *p*-value: ‘\*\*\*’: < 0.001; ‘\*\*’: < 0.01; ‘\*’: < 0.05; ‘.’: < 0.1.**

|                                             | <i>t</i> -value | <i>p</i> -value | Significance | Regression Coefficient |
|---------------------------------------------|-----------------|-----------------|--------------|------------------------|
| Vegetation density [stems m <sup>-2</sup> ] | -1.781          | 0.0893          | .            | -0.00013               |
| Water depth [m]                             | 1.704           | 0.1031          |              | 0.10431                |
| Slope [distance depth <sup>-1</sup> ]       | 3.141           | 0.0049          | **           | 0.00037                |
| Average fetch length [m]                    | 4.788           | 0.0001          | ***          | 0.00025                |

**Figures**

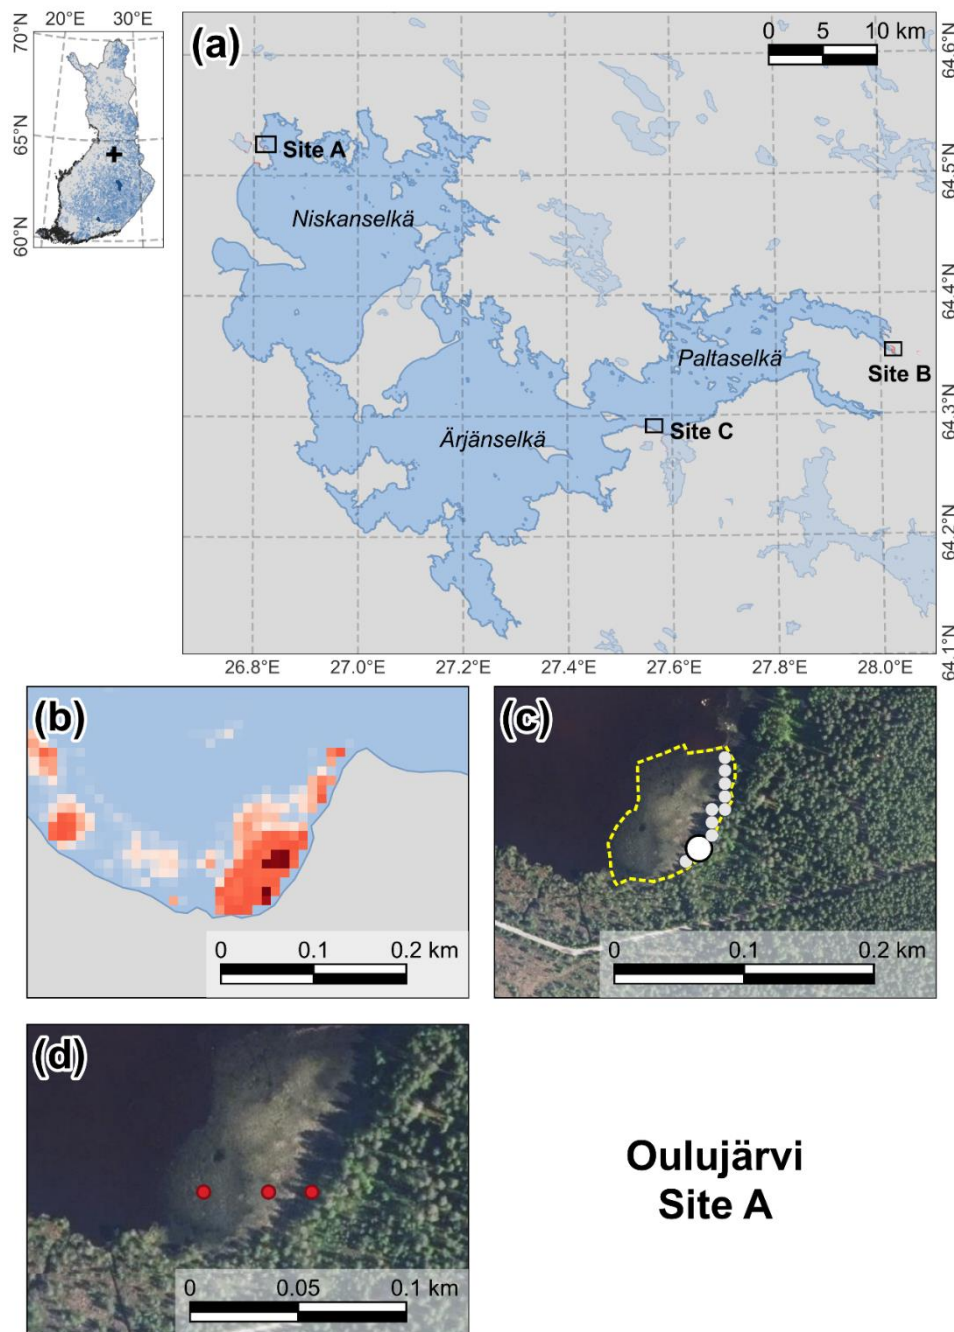

**Figure S1. Location of sampling Site A in Oulujärvi (a), with details of: (b) the vegetation patch (Koponen et al., 2022); (c) the starting points of the transect following a grid of 10 x 10 m; (d) the location of the sediment cores following the transect of landside, transitional and waterside. Aerial images from Finnish National Geoportal (Orthophotos) (2023).**

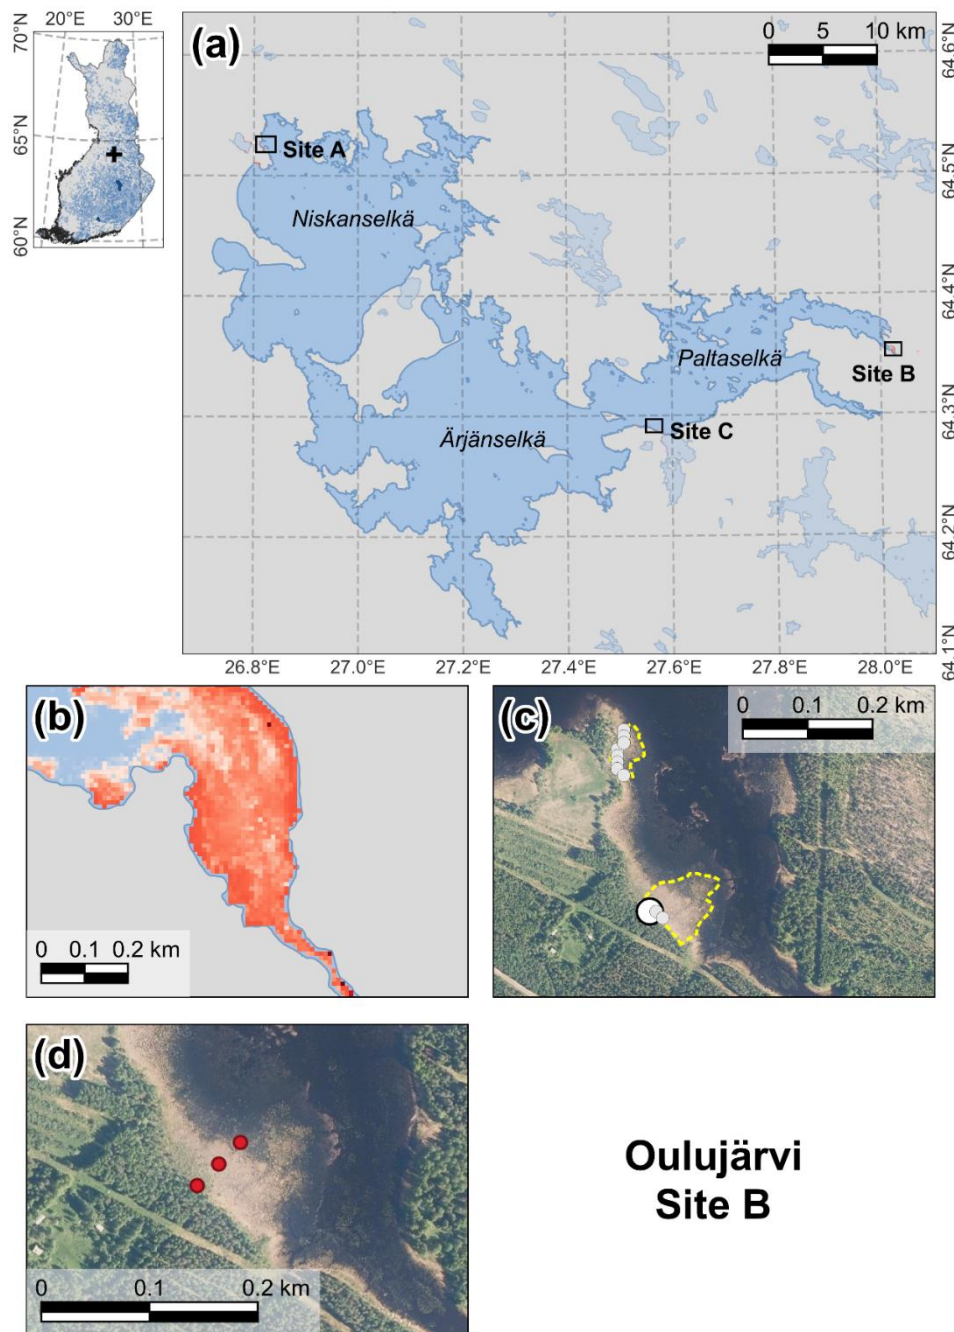

**Figure S2. Location of sampling Site B in Oulujärvi (a), with details of: (b) the vegetation patch (Koponen et al., 2022); (c) the starting points of the transect following a grid of 10 x 10 m; (d) the location of the sediment cores following the transect of landside, transitional and waterside. Aerial images from Finnish National Geoportal (Orthophotos) (2023).**

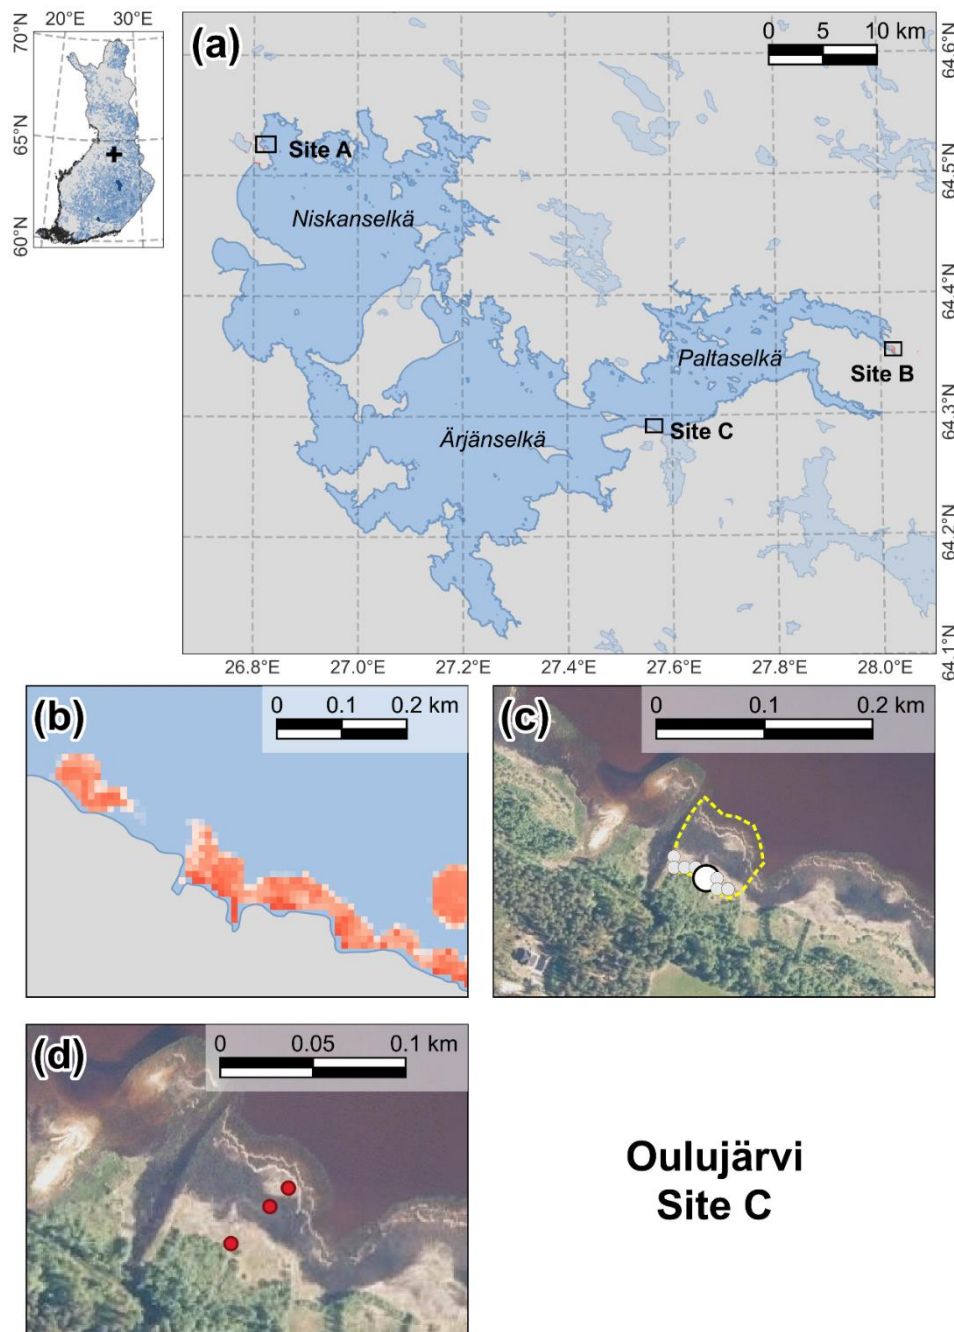

**Figure S3. Location of sampling Site C in Oulujärvi (a), with details of: (b) the vegetation patch (Koponen et al., 2022); (c) the starting points of the transect following a grid of 10 x 10 m; (d) the location of the sediment cores following the transect of landside, transitional and waterside. Aerial images from Finnish National Geoportal (Orthophotos) (2023).**



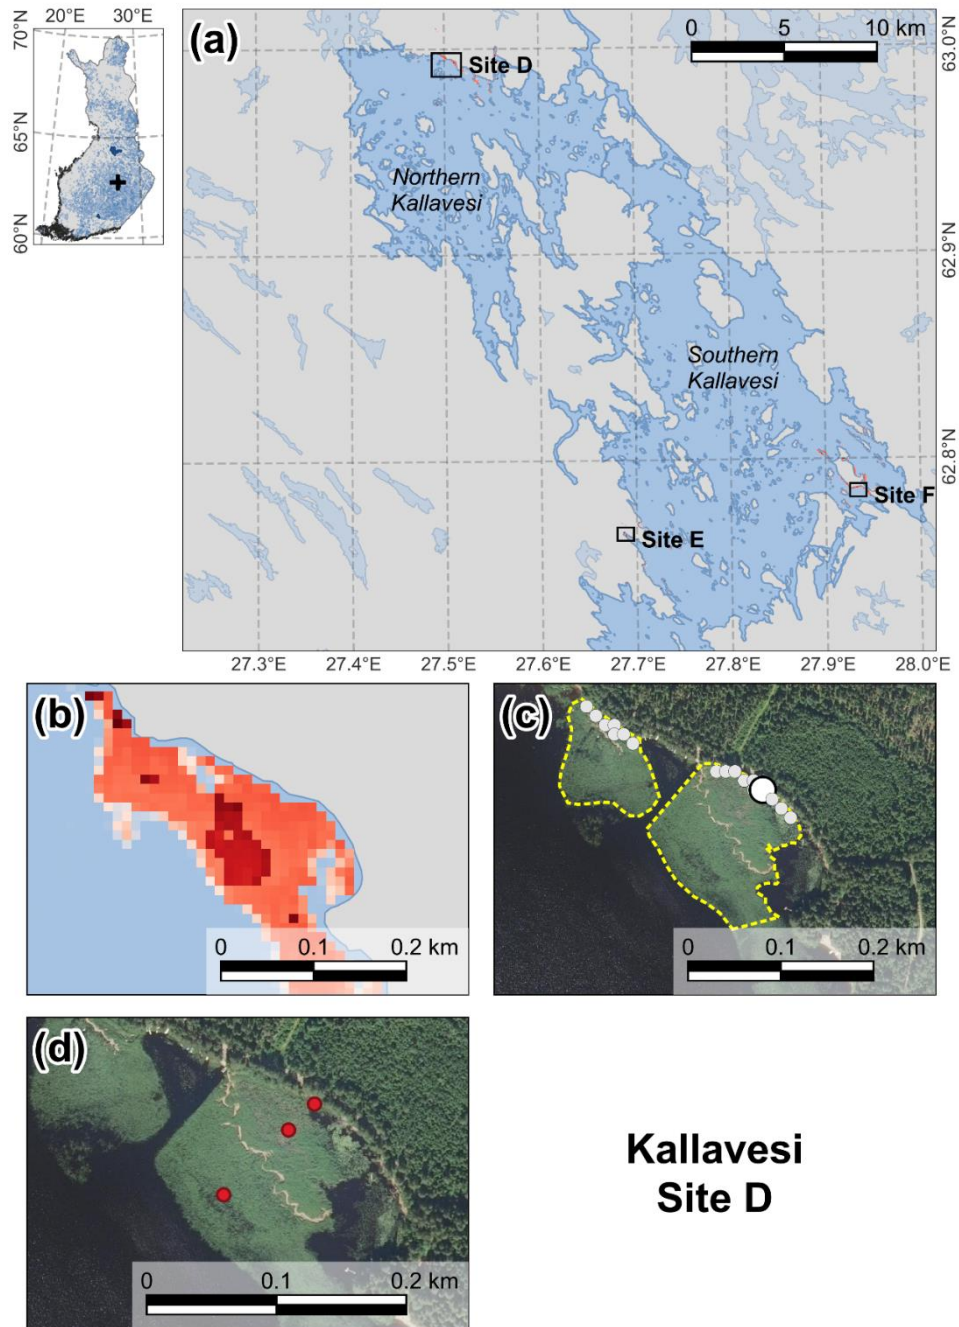

**Figure S4. Location of sampling Site D in Kallavesi (a), with details of: (b) the vegetation patch (Koponen et al., 2022); (c) the starting points of the transect following a grid of 10 x 10 m; (d) the location of the sediment cores following the transect of landside, transitional and waterside. Aerial images from Finnish National Geoportal (Orthophotos) (2023).**

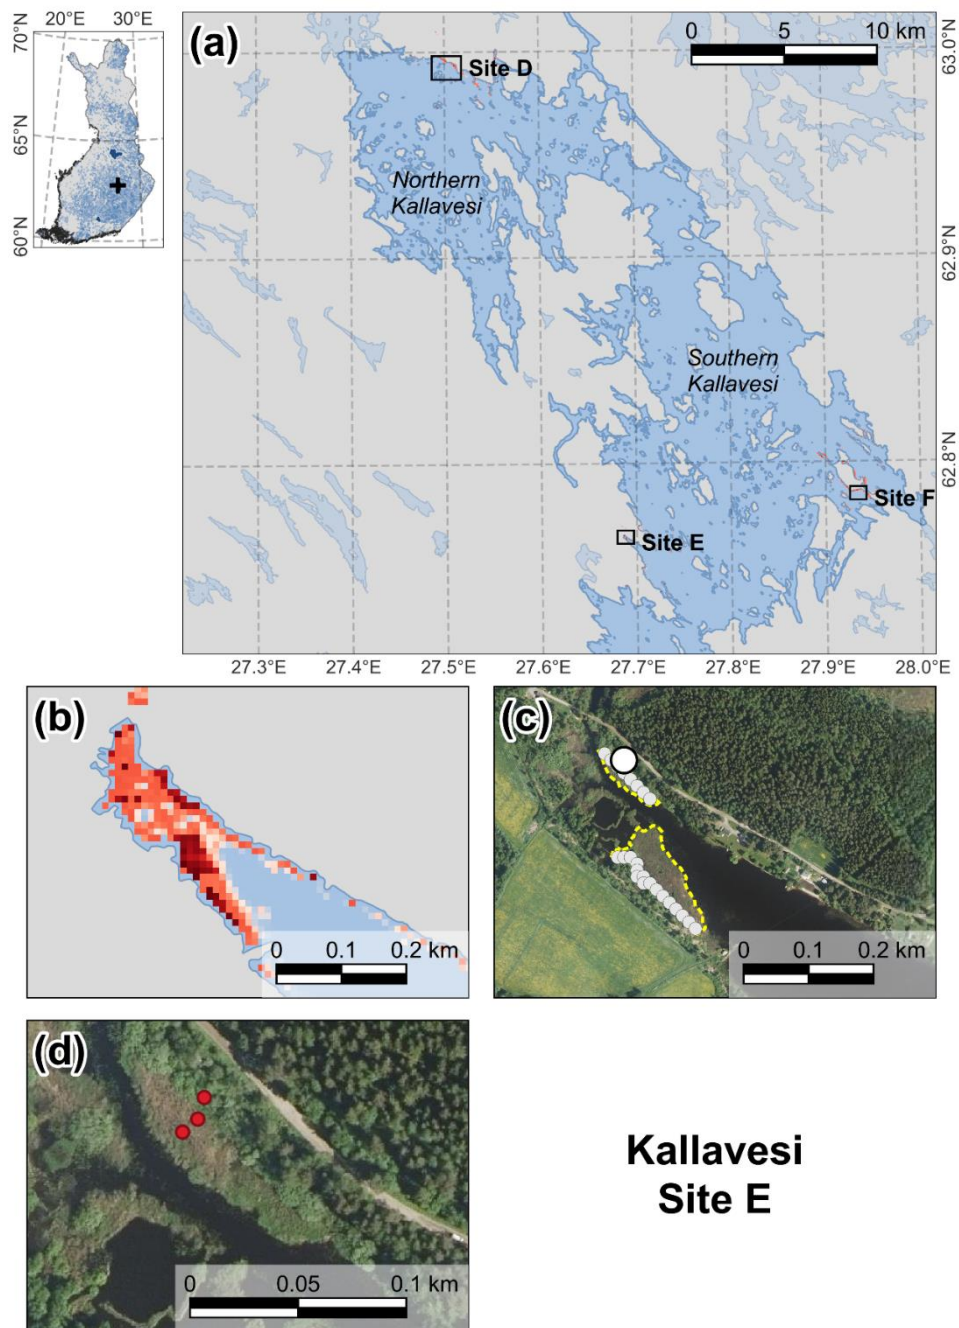

**Figure S5. Location of sampling Site E in Kallavesi (a), with details of: (b) the vegetation patch (Koponen et al., 2022); (c) the starting points of the transect following a grid of 10 x 10 m; (d) the location of the sediment cores following the transect of landside, transitional and waterside. Aerial images from Finnish National Geoportal (Orthophotos) (2023).**



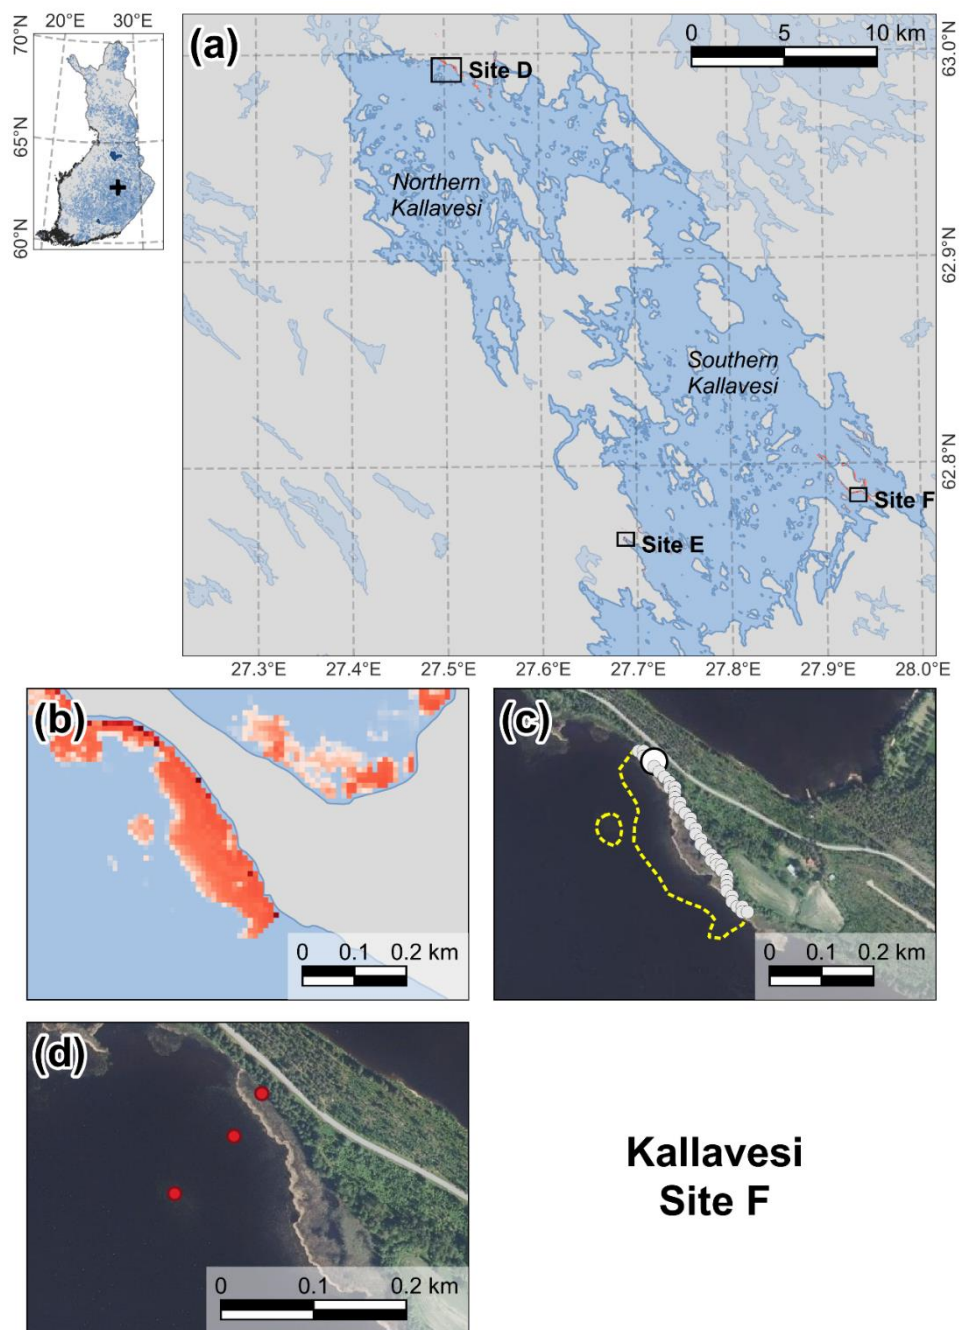

**Figure S6. Location of sampling Site F in Kallavesi (a), with details of: (b) the vegetation patch (Koponen et al., 2022); (c) the starting points of the transect following a grid of 10 x 10 m; (d) the location of the sediment cores following the transect of landside, transitional and waterside. Aerial images from Finnish National Geoportal (Orthophotos) (2023).**

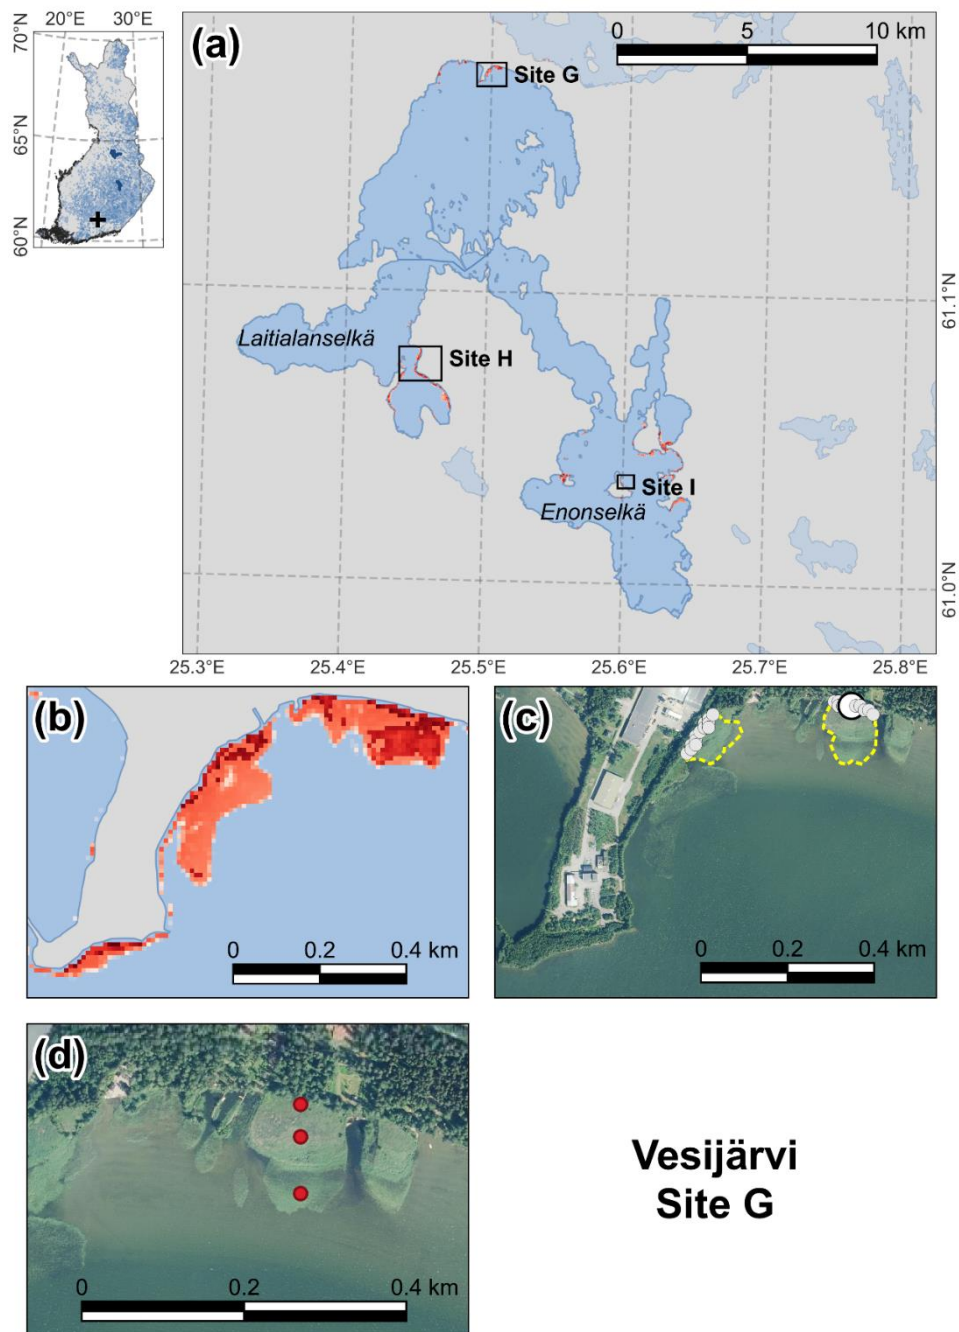

**Figure S7. Location of sampling Site G in Vesijärvi (a), with details of: (b) the vegetation patch (Koponen et al., 2022); (c) the starting points of the transect following a grid of 10 x 10 m; (d) the location of the sediment cores following the transect of landside, transitional and waterside. Aerial images from Finnish National Geoportal (Orthophotos) (2023).**

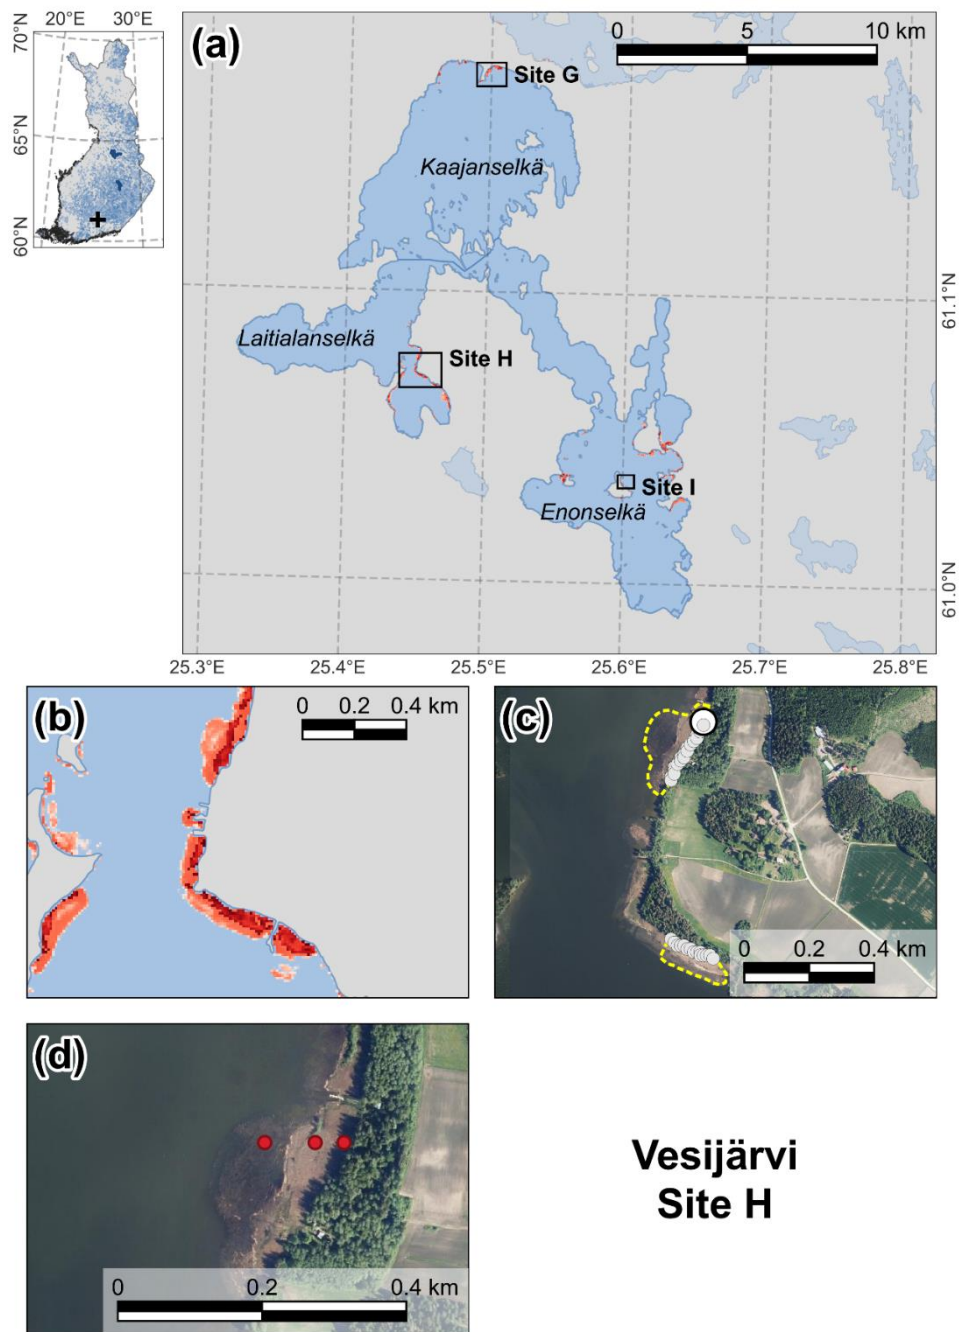

**Figure S8. Location of sampling Site H in Vesijärvi (a), with details of: (b) the vegetation patch (Koponen et al., 2022); (c) the starting points of the transect following a grid of 10 x 10 m; (d) the location of the sediment cores following the transect of landside, transitional and waterside. Aerial images from Finnish National Geoportal (Orthophotos) (2023).**

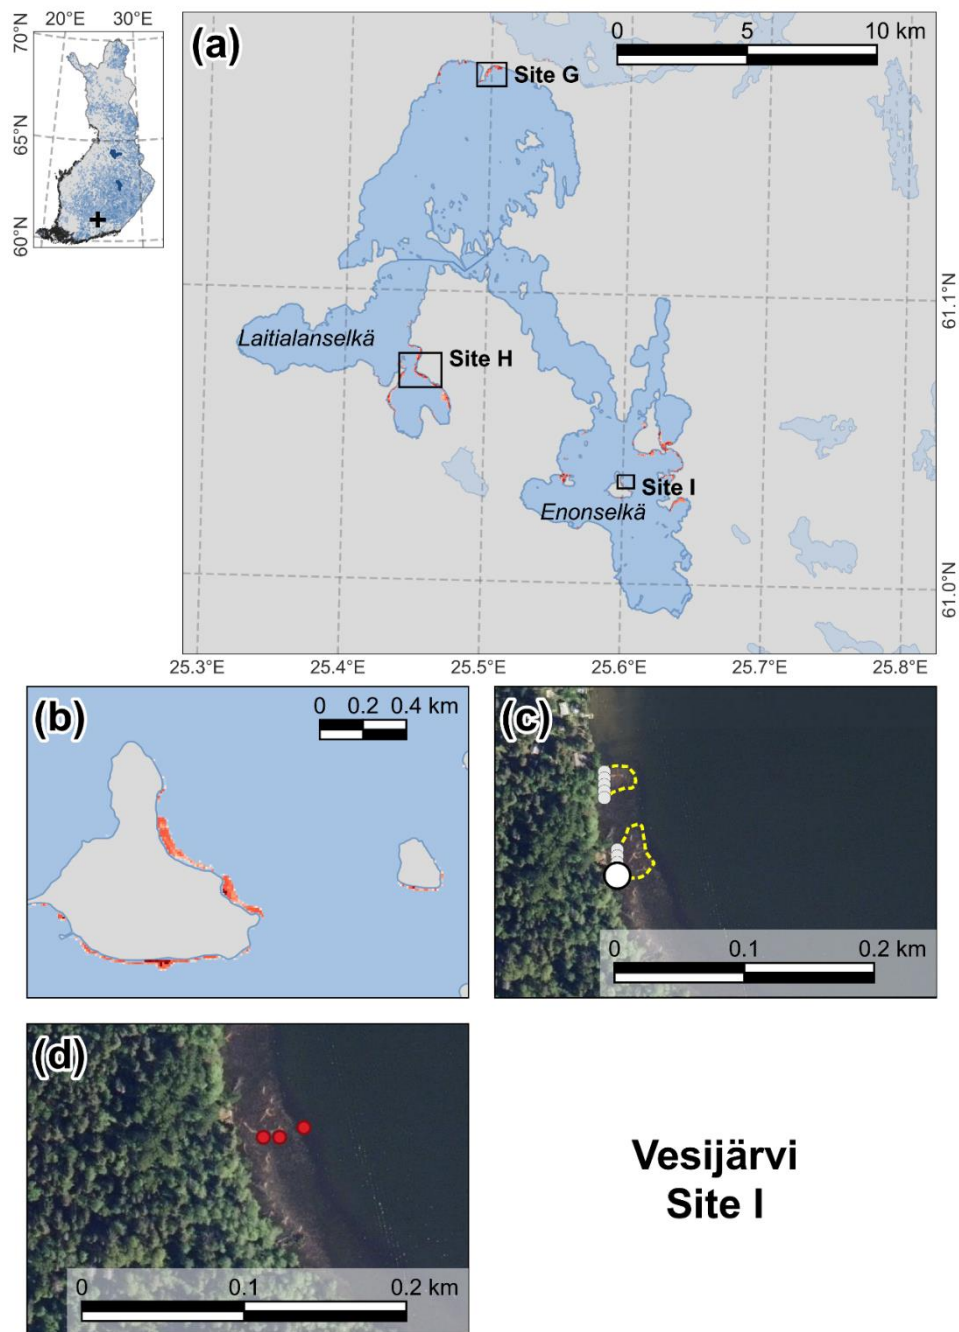

**Figure S9.** Location of sampling Site I in Vesijärvi (a), with details of: (b) the vegetation patch (Koponen et al., 2022); (c) the starting points of the transect following a grid of 5 x 5 m; (d) the location of the sediment cores following the transect of landside, transitional and waterside. Aerial images from Finnish National Geoportal (Orthophotos) (2023).



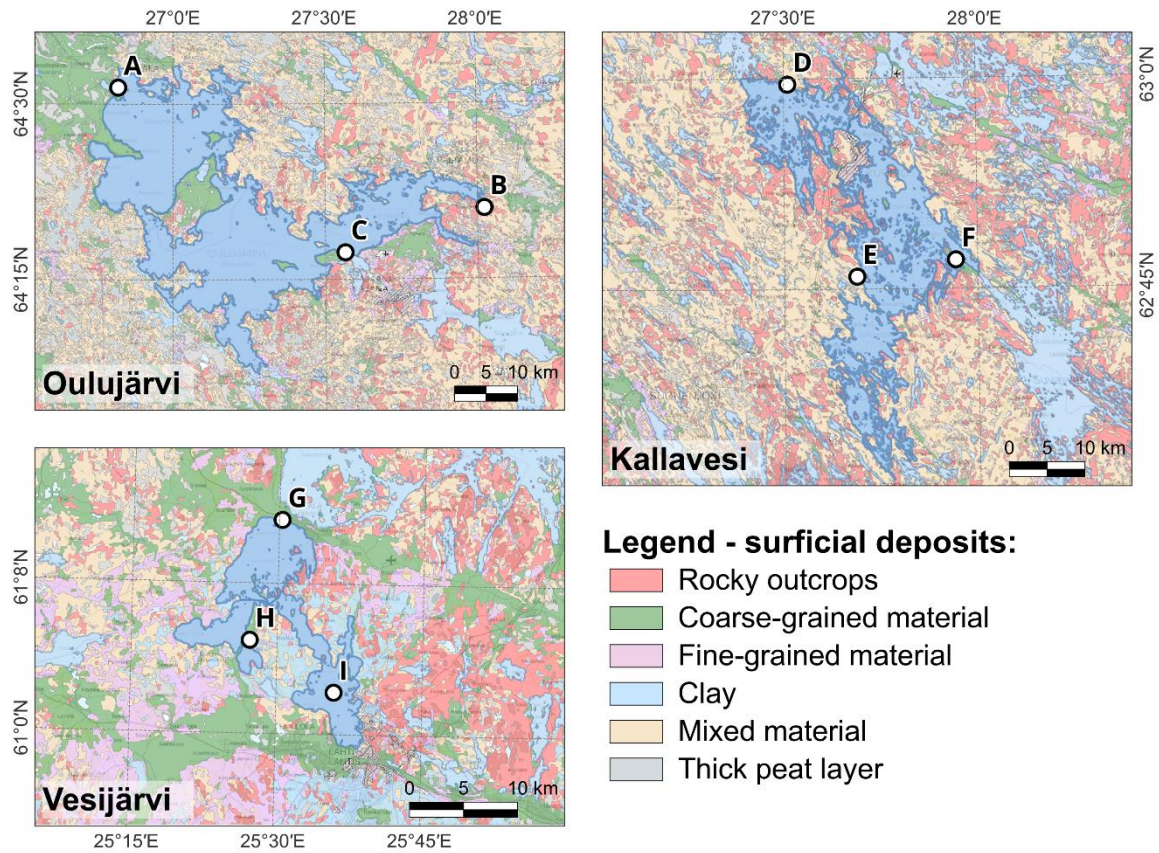

**Figure S10.** Main surficial deposits found in the surroundings of lakes Oulujärvi (top left panel), Kallavesi (top right panel) and Vesijärvi (bottom left panel) (GTK, 2024).









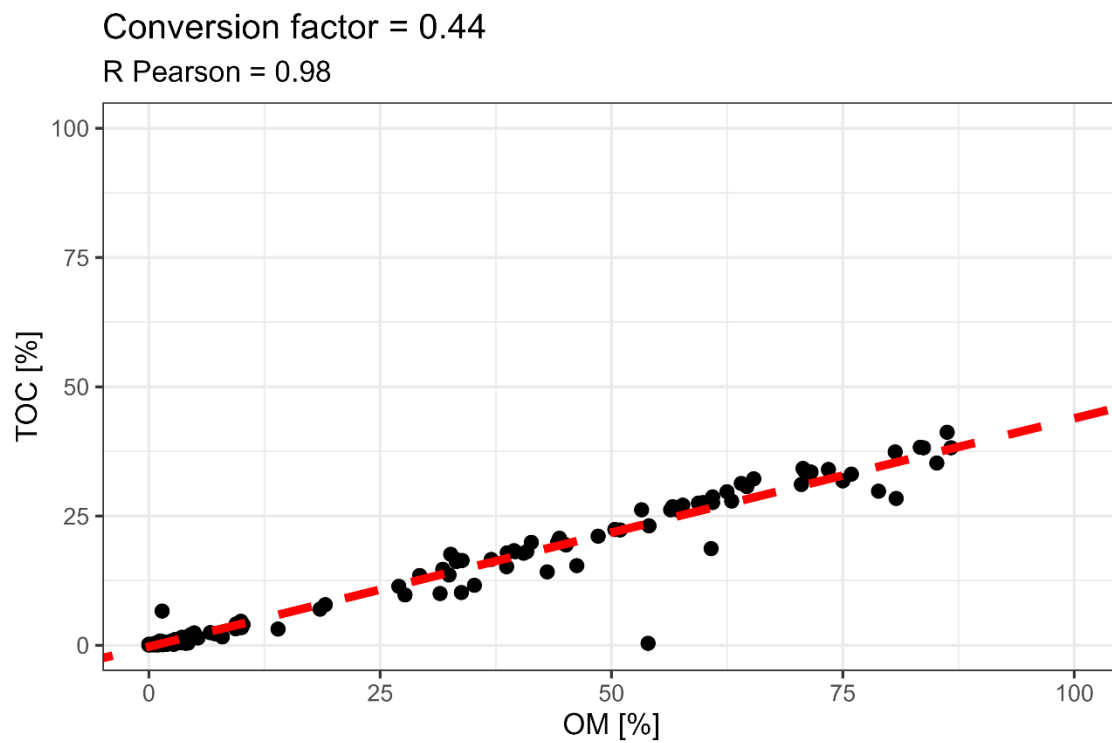

**Figure S14. Scatterplot between organic matter (OM) and total organic carbon (TOC) content for 173 sediment samples.**

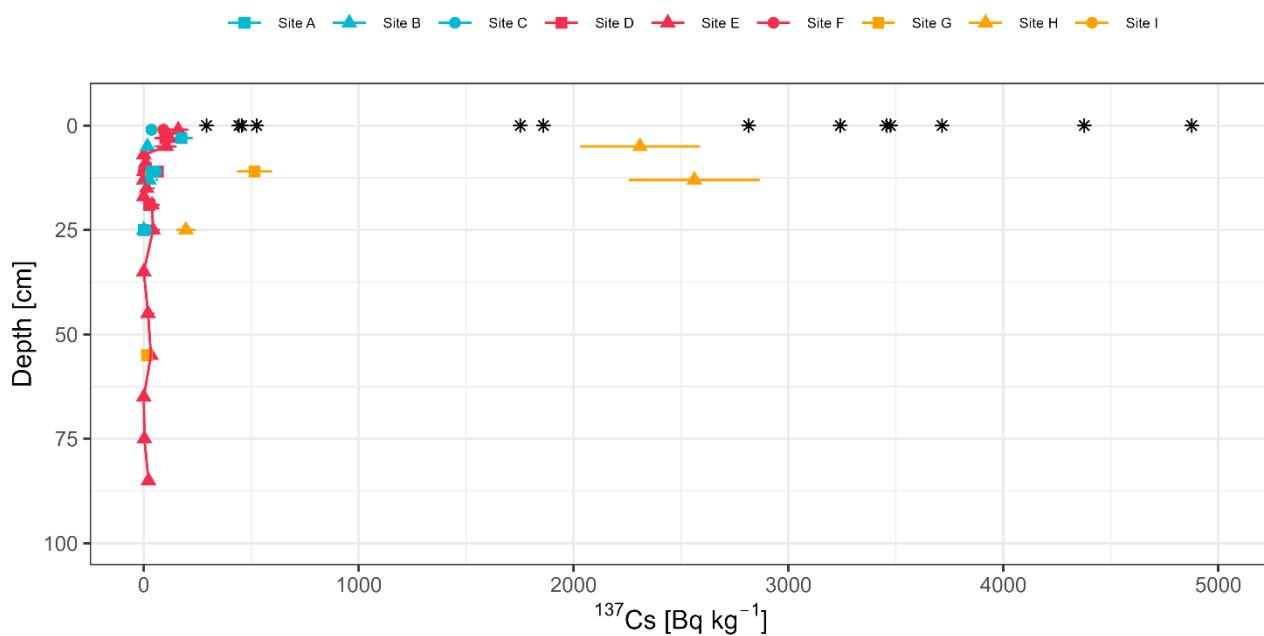

**Figure S15.**  $^{137}\text{Cs}$  distribution in our cores [Bq kg $^{-1}$ ]. The \* symbols indicate peak values of total  $^{137}\text{Cs}$  deposition observed in deeper areas of the studied lakes (Junna et al., *in press*).

**Site C – Transitional:**

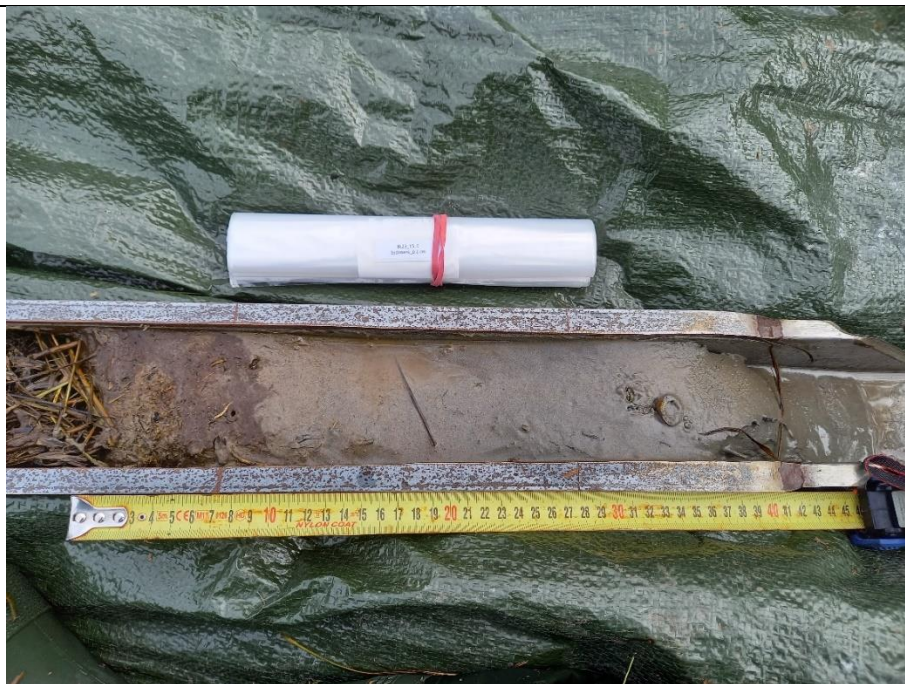

**Site G – Landside:**

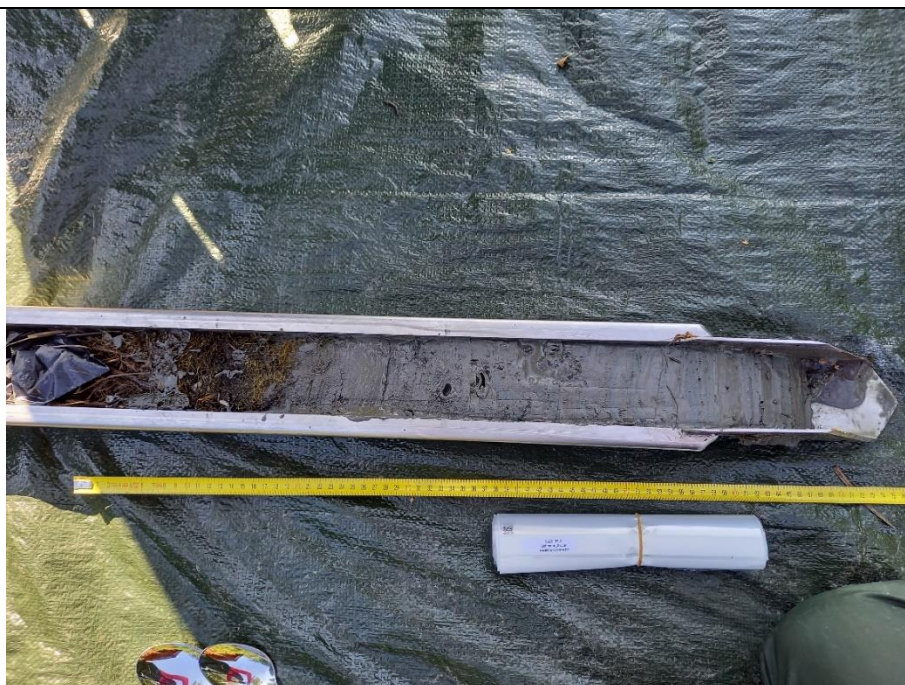

**Figure S16. Pictures of selected sediment cores evidencing the clear unconformities between a surface layer rich in organic material and basal organic-poor material.**

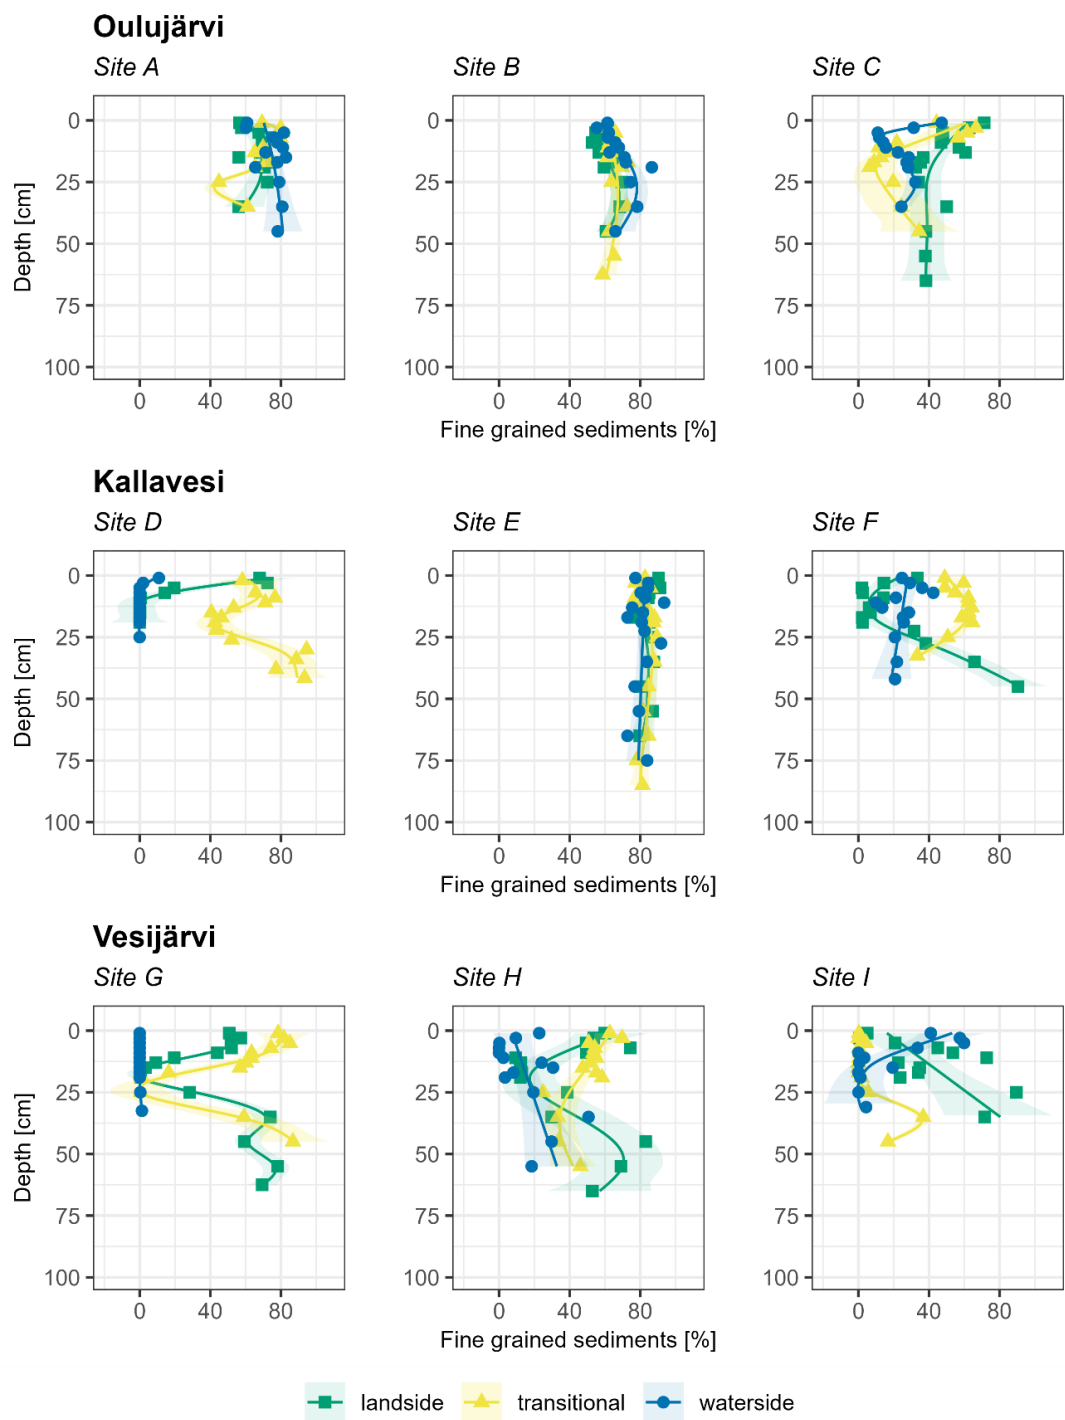

**Figure S17. Vertical profiles of grain size distribution.**

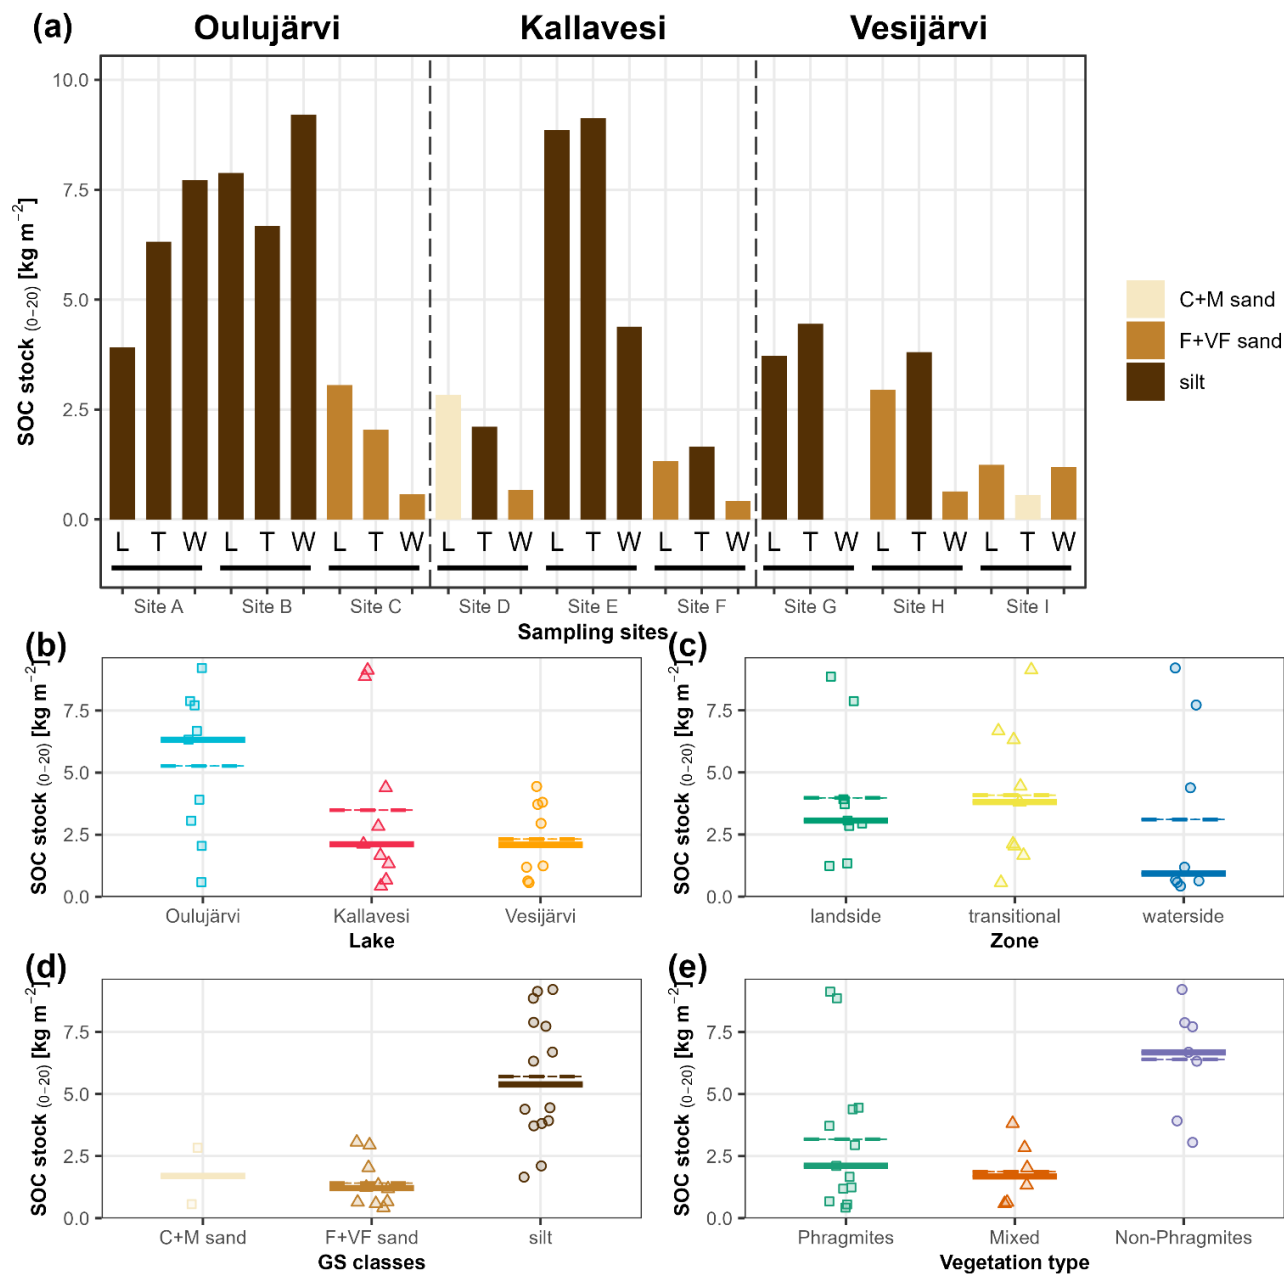

**Figure S18.** Sedimentary organic carbon (SOC) stocks [ $\text{kg m}^{-2}$ ] of the top 20 cm of the sediment cores (a) and grouped by lakes (b), shoreline zones (c), grain size classes (d) and vegetation type (e). Stock estimates consider only samples with > 1 % of organic matter. In panels (b) to (e), the dashed horizontal lines indicate the mean, and the continuous bold horizontal lines indicate the median. Abbreviations: L = landside zone; T = transitional zone; W = waterside zone; C+M sand = coarse and medium sands; F+VF sand = fine and very fine sands. In (a), the bars are coloured according to the grain size averaged through the whole sediment core.

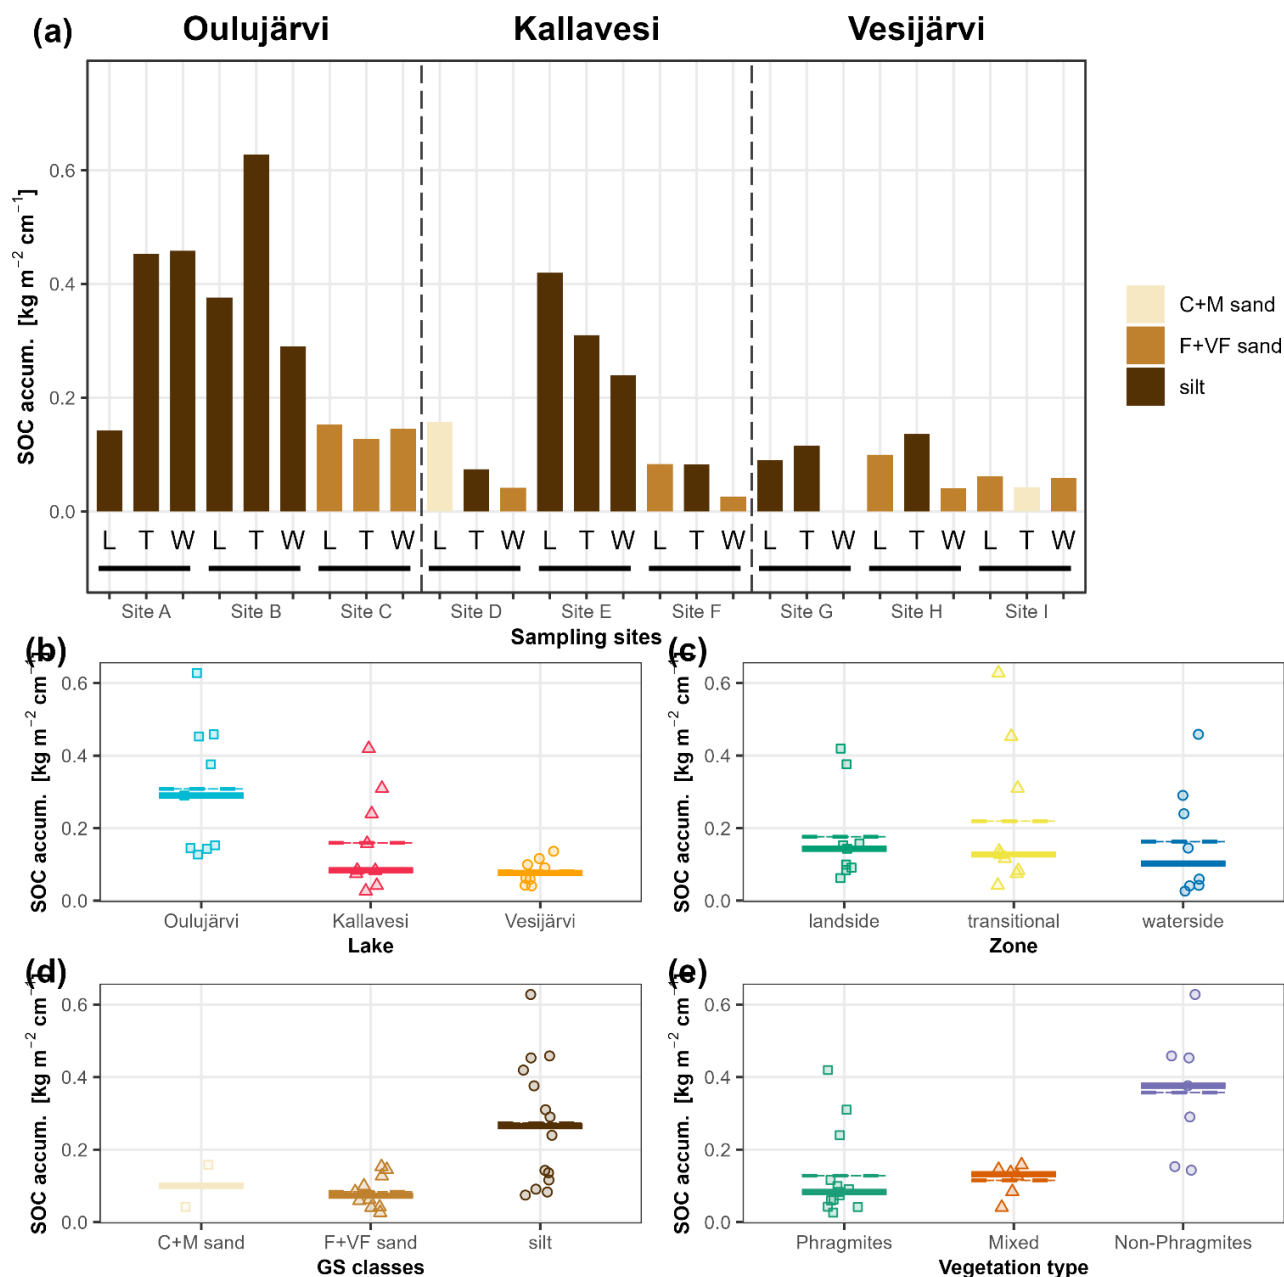

**Figure S19.** Sedimentary organic carbon (SOC) accumulation [kg m<sup>-2</sup> cm<sup>-1</sup>] of the sediment cores (a) and grouped by lakes (b), shoreline zones (c), grain size classes (d) and vegetation type (e). Accumulation estimates consider only samples with > 1 % of organic matter. In panels (b) to (e), the dashed horizontal lines indicate the mean, and the continuous bold horizontal lines indicate the median. Abbreviations: L = landside zone; T = transitional zone; W = waterside zone; C+M sand = coarse and medium sands; F+VF sand = fine and very fine sands. In (a), the bars are coloured according to the grain size averaged through the whole sediment core.

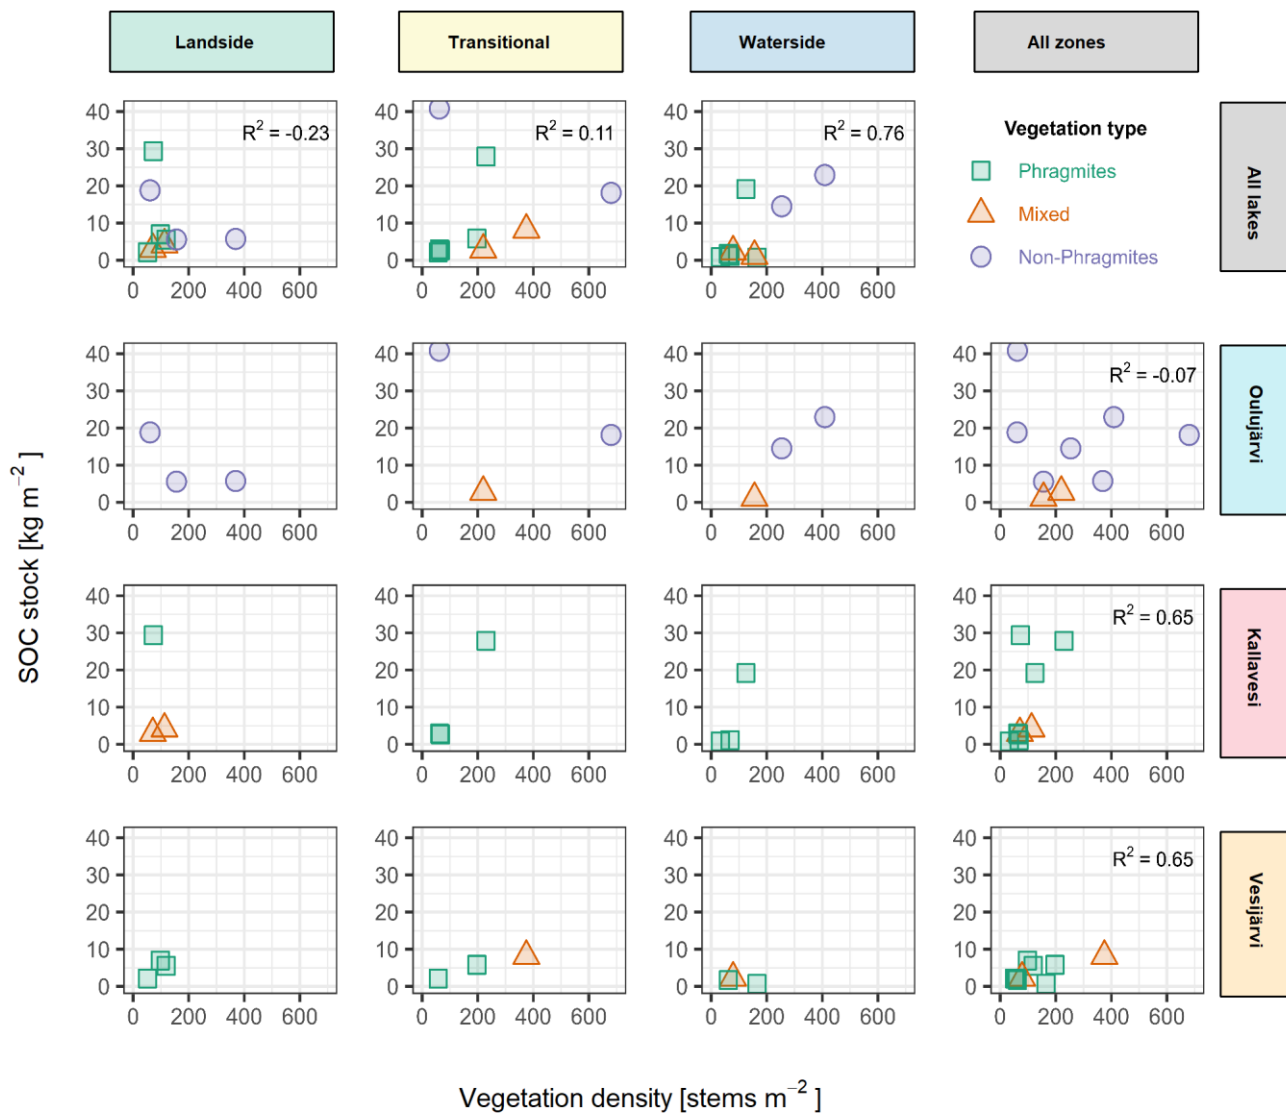

**Figure S20.** Comparison between sedimentary organic carbon (SOC) [ $\text{kg m}^{-2}$ ] and vegetation density [ $\text{stems m}^{-2}$ ], grouped by zones (columns), lakes (rows) and type of vegetation (symbol colours).

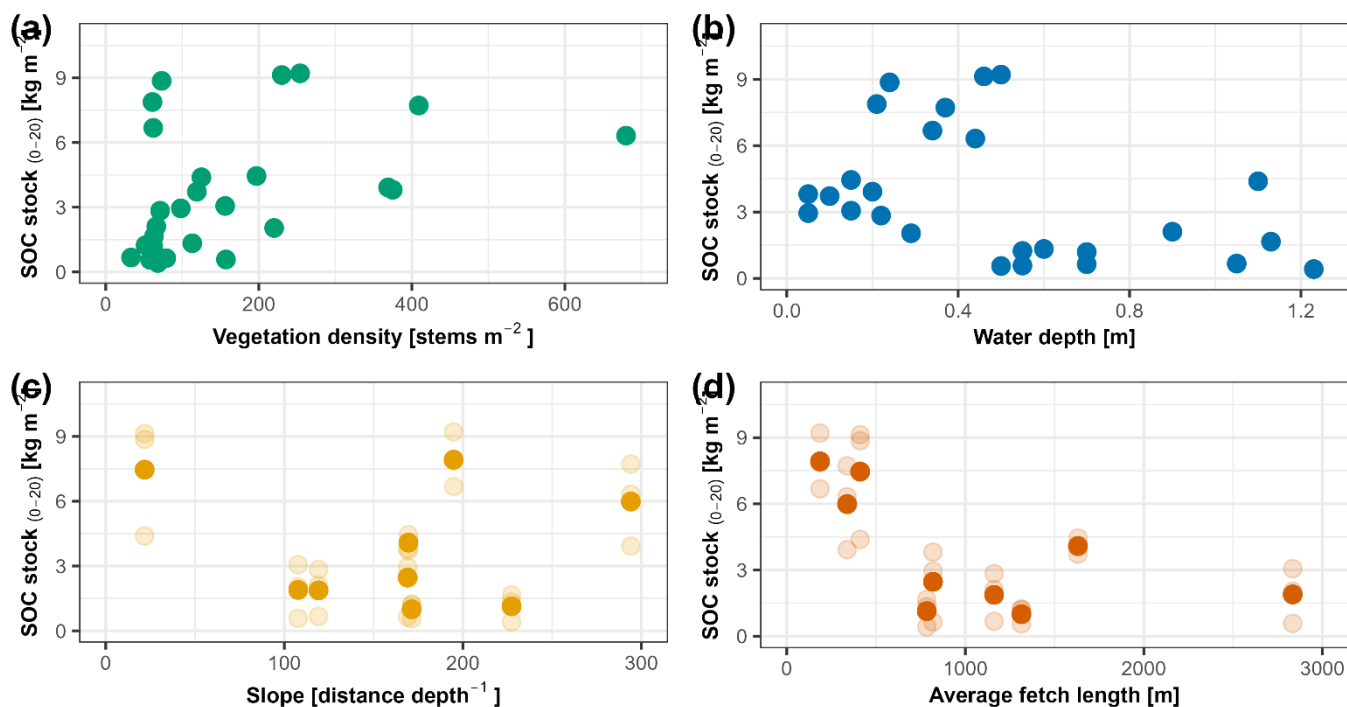

**Figure S21.** Relationship between sedimentary organic carbon (SOC) stocks [ $\text{kg m}^{-2}$ ] based on the top 20 cm of the sediment cores and environmental parameters: (a) vegetation density [number of helophyte stems, in  $\text{stems m}^{-2}$ ], (b) water depth [m], (c) slope (calculated as the distance between the landside and waterside sampling locations divided by the difference in their depth), (d) and the average fetch length [m]. In plots (c) and (d), the translucent points indicate the SOC stocks per zone (landside, transitional, waterside) in each site (A to I), while the opaque points indicate the average SOC stock estimates in each site.



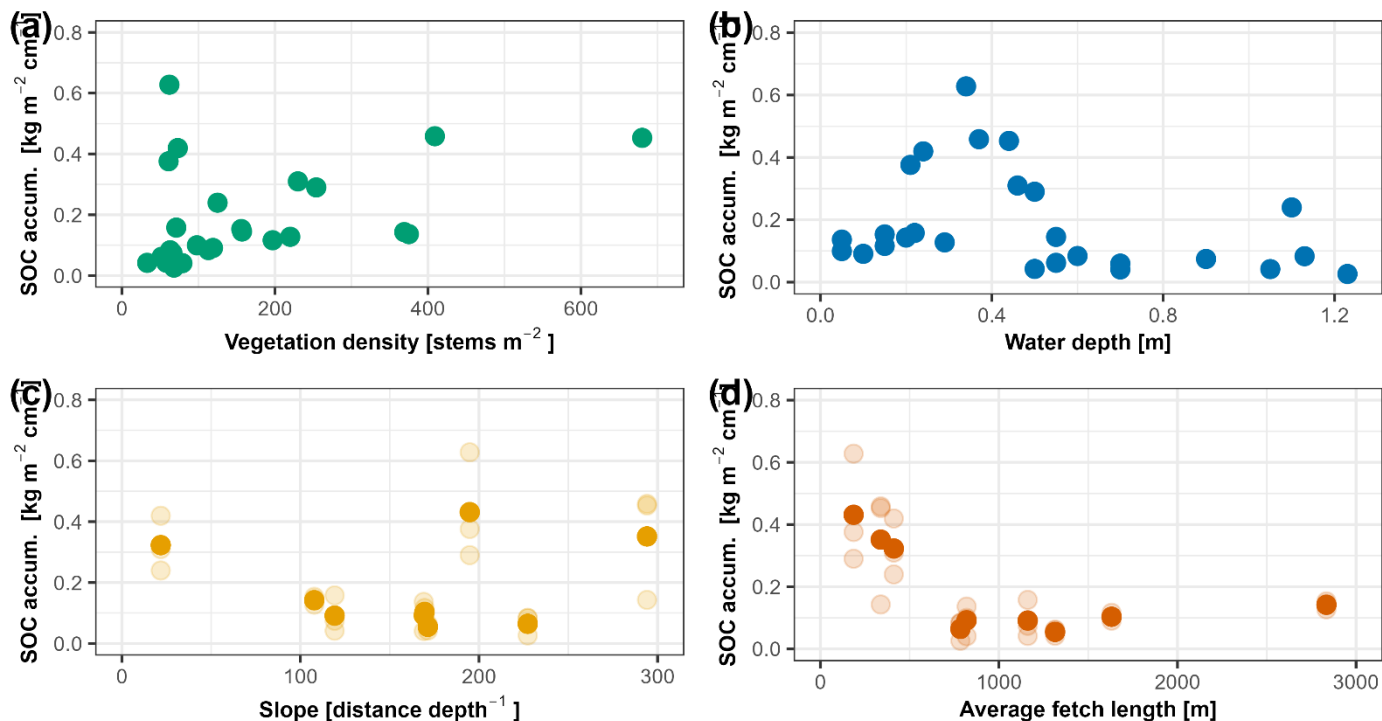

**Figure S22. Relationship between sedimentary organic carbon (SOC) accumulation [ $\text{kg m}^{-2} \text{cm}^{-1}$ ] and environmental parameters: (a) vegetation density [number of helophyte stems, in  $\text{stems m}^{-2}$ ], (b) water depth [m], (c) slope (calculated as the distance between the landside and waterside sampling locations divided by the difference in their depth), (d) and the average fetch length [m]. In plots (c) and (d), the translucent points indicate the SOC stocks per zone (landside, transitional, waterside) in each site (A to I), while the opaque points indicate the average SOC stock estimates in each site.**

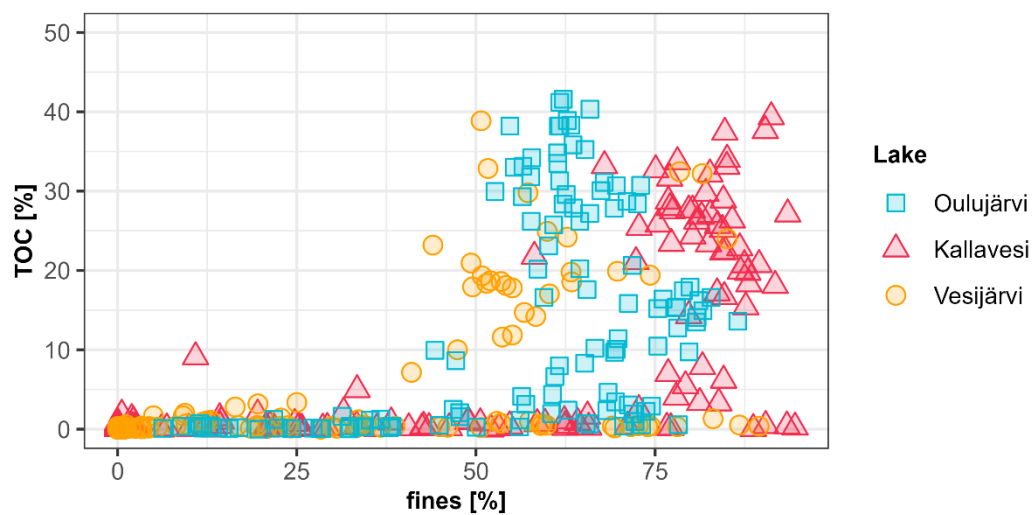

**Figure S23. Relationship between total organic carbon (TOC, in % dw) with grain size distribution (% of fine-grained sediments (silt + clay)).**

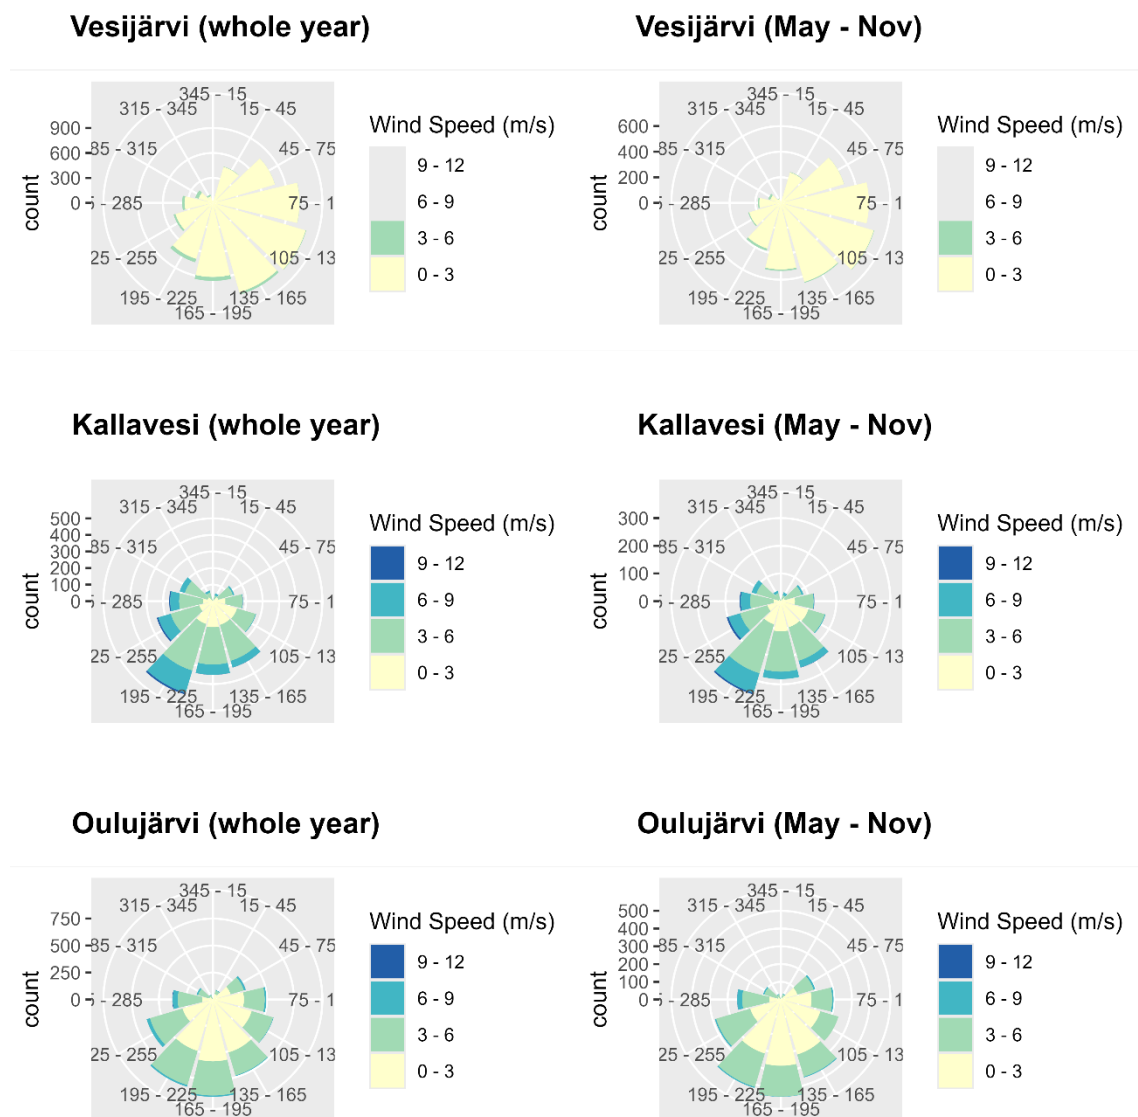

**Figure S24. Wind roses of the three studied lakes, considering the whole year (left panels) and between May and November (no ice coverage, right panels) (FMI database, 2025).**

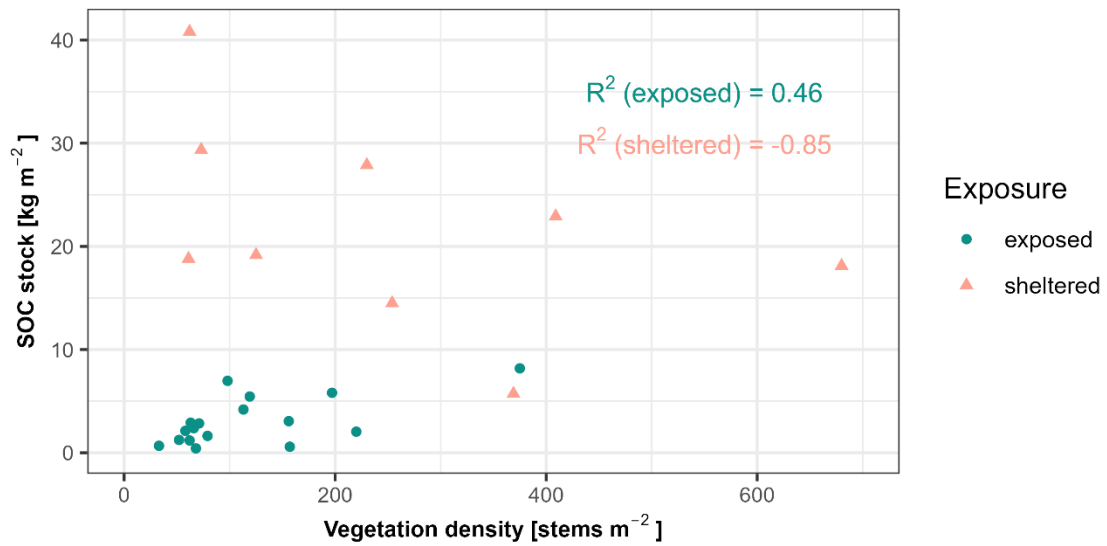

**Figure S25.** Comparison between sedimentary organic carbon (SOC) [kg m<sup>-2</sup>] and vegetation density [stems m<sup>-2</sup>], grouped by average fetch length (“exposed”: fetch > 500 m; “sheltered”: fetch ≤ 500 m).

## References

FMI database (daily “Wind direction” and “Wind speed”): <https://en.ilmatieteenlaitos.fi/download-observations>, last access: 27  
95 January 2025.

Maankamara: <https://gtkdata.gtk.fi/maankamara/>, last access: 3 April 2024.

Junna, T., Asmala, E., Mäkinen, J., Kortelainen, P., Jilbert, T., and Koho, K.: Land use as a key driver of increased organic carbon  
burial in boreal lakes, *Biogeochemistry*, n.d.

Koponen, S., Väkevä, S., Jokinen, A.-P., Virtanen, E., Viitasalo, M., Blenckner, T., and Cervo, A. de: Blue Carbon Habitats - a  
100 comprehensive mapping of Nordic salt marshes for estimating Blue Carbon storage potential,  
<https://doi.org/10.6027/temanord2022-506>, 2022.

Finnish National Geoportal (Orthophotos): <https://kartta.paikkatietoikkuna.fi/?lang=en>, last access: 17 July 2023.

Hertta database of Syke, 3rd River Basin Management Plan, data from 2012-2017: [https://www.syke.fi/fi-](https://www.syke.fi/fi-fi/avoin_tieto/ymparistotietojarjestelmat)  
fi/avoin\_tieto/ymparistotietojarjestelmat, last access: 21 January 2025.

105
